# Supplementary material
Source: PubMed Central journal article supplement (PMC4613916)
Supplement: supp_dc15-0137v150137_DC150137SupplementaryData.pdf [file supp_dc15-0137v150137_DC150137SupplementaryData.pdf]

SUPPLEMENTARY DATA

**Supplementary Figure S1.** Timeline showing the collection of sleep symptoms and glycemetic outcomes

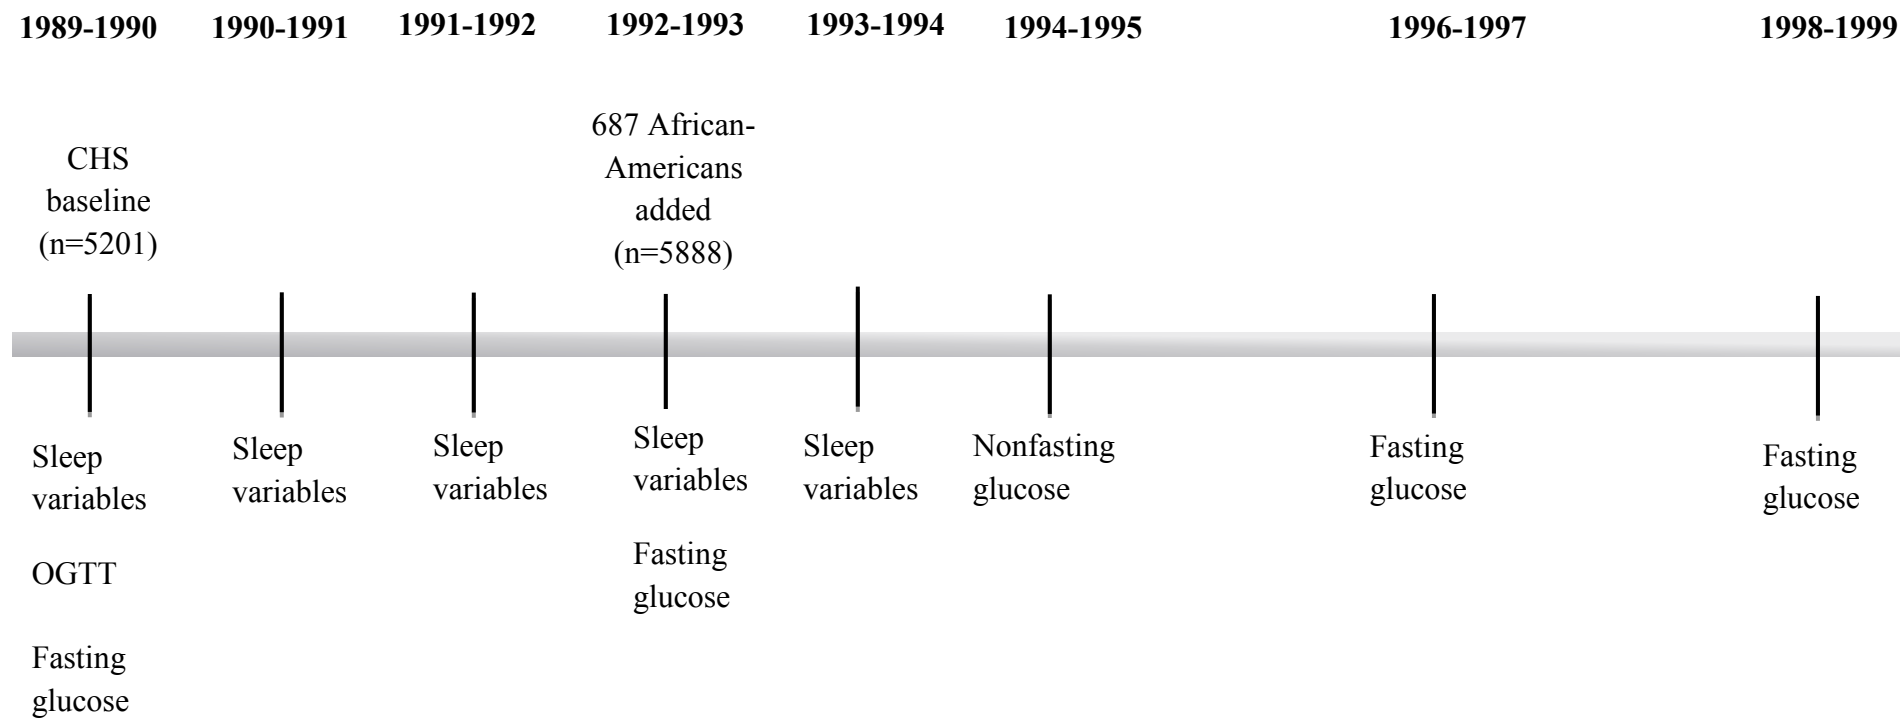

SUPPLEMENTARY DATA

**Supplementary Figure S2.** The participant selection process for the glucose metabolism cohorts

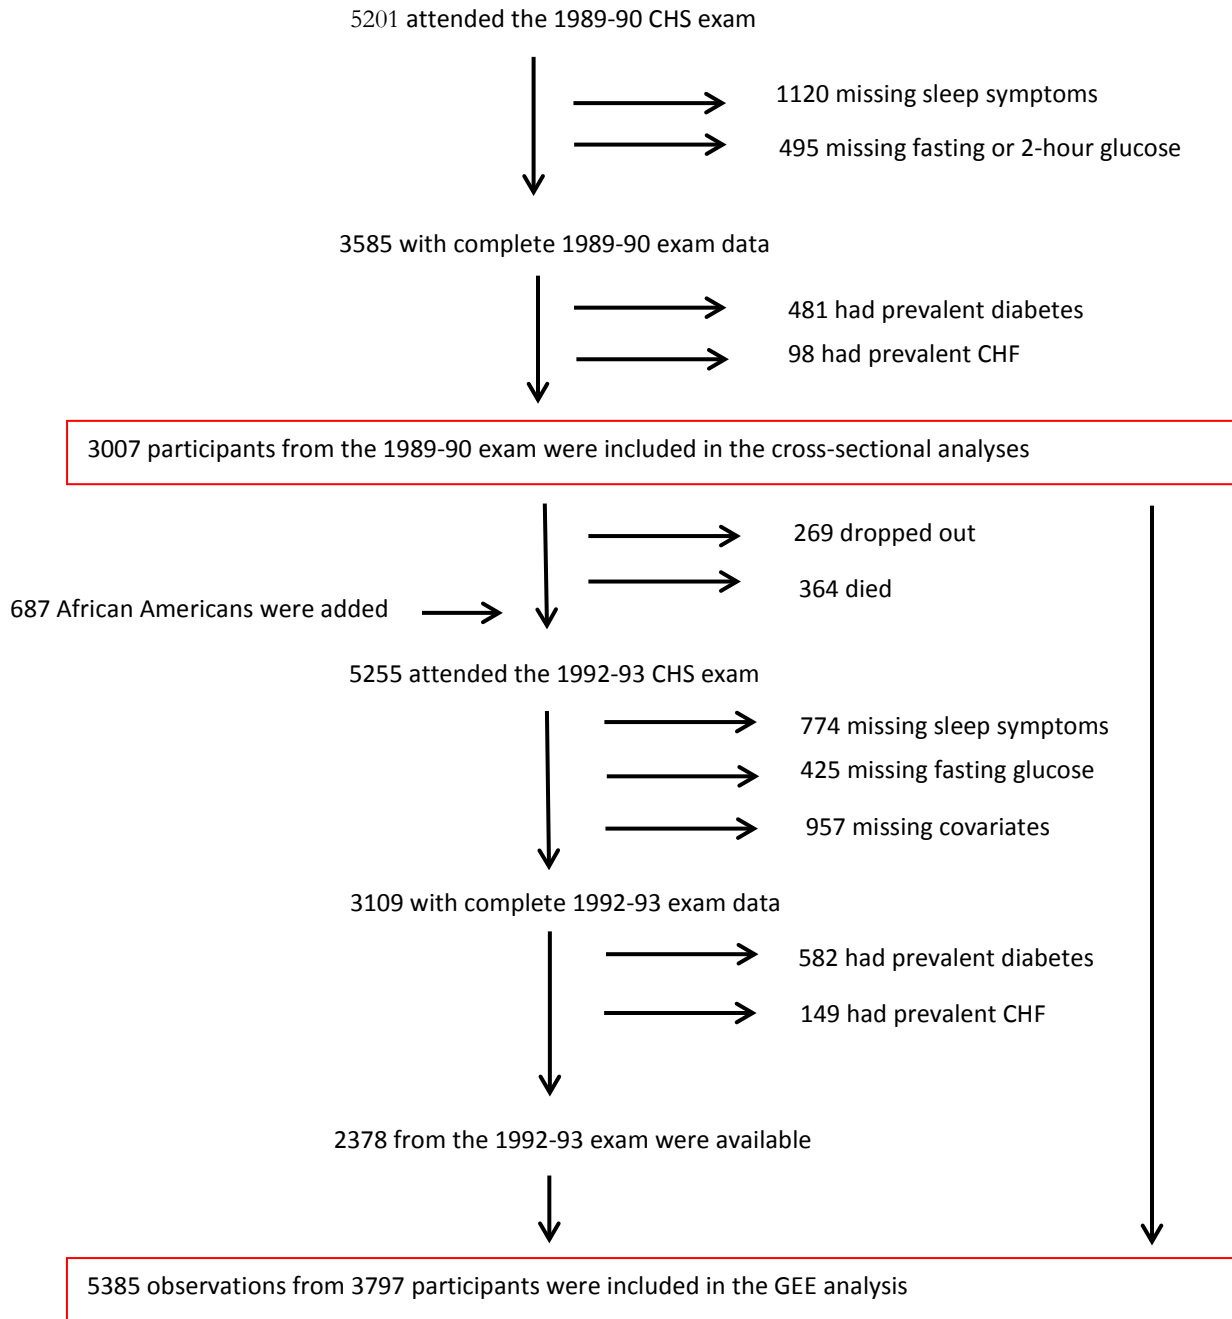

SUPPLEMENTARY DATA

**Supplementary Figure S3.** Participant selection process for the type 2 diabetes cohort

5888 attended the baseline examinations in 1989-90 and 1992-93

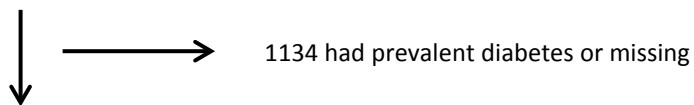

4754 with diabetes type 2 follow-up

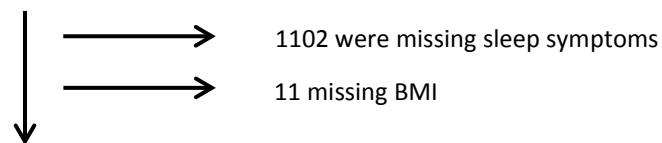

3641 with complete exam data

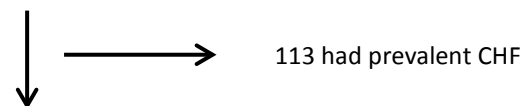

3528 participants from the 1989-90 and the 1992-93 baseline exams were included in the prospective analyses

SUPPLEMENTARY DATA

**Supplementary Table S1.** Pearson's Phi coefficient between the sleep symptoms

|                                   | <i>Daytime sleepiness</i> | <i>Sleep initiation problems</i> | <i>Sleep maintenance problems</i> | <i>Early morning awakenings</i> | <i>Observed apnea</i> | <i>Bothersome snoring</i> |
|-----------------------------------|---------------------------|----------------------------------|-----------------------------------|---------------------------------|-----------------------|---------------------------|
| <i>Daytime sleepiness</i>         | 1.00                      |                                  |                                   |                                 |                       |                           |
| <i>Sleep initiation problems</i>  | 0.10                      | 1.00                             |                                   |                                 |                       |                           |
| <i>Sleep maintenance problems</i> | 0.11                      | 0.23                             | 1.00                              |                                 |                       |                           |
| <i>Early morning awakenings</i>   | 0.17                      | 0.31                             | 0.27*                             | 1.00                            |                       |                           |
| <i>Observed apnea</i>             | 0.06                      | 0.04                             | 0.02                              | 0.03                            | 1.00                  |                           |
| <i>Bothersome snoring</i>         | 0.10                      | 0.03*                            | 0.02                              | 0.05                            | 0.34*                 | 1.00                      |

\* These correlations were NOT significant at the 0.05 alpha-level
